1 Transgenic mouse facial nerve model of synkinesis

2 Original Research

3

4 Mostafa M Ahmed MD<sup>1</sup>, Alexander Deich BA<sup>2</sup>, Grace Balfour BA<sup>1</sup>, Adrienne Laury MD<sup>1</sup>,  
5 Arkady Lorin MD<sup>1</sup>, David Silliman BS<sup>1</sup>, Richard L. Williams DMD, PhD<sup>1</sup>

6

7 <sup>1</sup>US Army Institute of Surgical Research, Ft Sam Houston, TX

8

9 <sup>2</sup>University of Illinois, Department of Physics, Urbana, IL

10

11

12

13 Corresponding Author (current address)

14 Mostafa Ahmed, MD

15 Department of Otolaryngology-Head and Neck Surgery

16 Carl Darnall Army Medical Center

17 36065 Santa Fe Ave

18 Fort Hood, TX 76544

19 Email: [mmahm3d@gmail.com](mailto:mmahm3d@gmail.com)

20

21 Keywords: Facial nerve, Synkinesis, Schwann cells

22

23

24

25

26

27

28

29

30 Abstract:

31 Hypothesis: Our central hypothesis is that inhibition of Schwann cell de-differentiation,  
32 in the post-injury setting, will reduce synkinesis and improve facial muscle function

33 Background: No therapies exist to improve the accuracy of facial nerve regeneration.

34 Following peripheral nerve injury, adult reactive Schwann cells de-differentiate and  
35 express glial fibrillary acidic protein (GFAP); suggesting that reactive Schwann cells  
36 impact axonal regeneration precision.

37

38 Methods: Transgenic GFAP-thymidine kinase (TK) mouse model was employed,  
39 allowing selective downregulation of reactive GFAP expressing Schwann cells on  
40 exposure of 7 day osmotic pump delivery of ganciclovir. Adult female transgenic GFAP-  
41 TK mice had right facial nerve transected and then immediately repaired with tissue  
42 glue, they then either were treated with saline or ganciclovir (GCV). At 6 weeks post-  
43 injury, mice were exposed to random air puffs events while high speed videography  
44 recorded whisker and eye movement. MatLab code video processing with publicly  
45 available BIOTACT algorithm automatically tracked whiskers.

46 Results: Whisker velocity was calculated using binning statistical analysis. Saline  
47 treated animals confirmed our model's ability to detect aberrant movement such that  
48 intact (left) facial nerves caused whisker protraction, while repaired (right) facial nerves  
49 had retraction. Administration of GCV increased whisker retraction compared to saline.  
50 GCV did not impact intact animal whisker movement compared to repaired whiskers.

51

52 Conclusions: Inhibition of reactive Schwann cell proliferation appears to worsen the  
53 degree of synkinesis, providing important insight into a potential therapeutic target for  
54 facial nerve injury.

55

56

57

58

59

60

61

62

63

64

65

66

67

68

69

70

## 71 INTRODUCTION

72 Facial nerve injury severely limits facial function typically resulting in weak facial  
73 expressions and abnormal simultaneous mouth movement and eye closure or  
74 synkinesis <sup>1</sup>. This aberrancy can occur either within the nerve fascicles itself or at the  
75 facial muscle motor end-plates, resulting in the physiologic finding of synkinesis <sup>2</sup>.  
76 Despite advances in microsurgical techniques, complete nerve transection with primary  
77 neurorrhaphy is classically believed to lead incomplete recovery with synkinesis.  
78 A well-characterized model to study nerve reinnervation is the mouse femoral nerve  
79 transection model<sup>3</sup>. In the femoral nerve model, there are two main branches re-  
80 innervating motoneurons can follow, namely the motor branch or the cutaneous  
81 (saphenous) branch. To investigate the role of neurotrophic factors on axonal guidance,  
82 the transgenic GFAP-thymidine kinase (TK) mouse model was employed. GFAP is  
83 expressed solely in reactive Schwann cells and not in uninjured Schwann cell  
84 environments <sup>3</sup>. Administration of ganciclovir (GCV) ablates these reactive Schwann  
85 cells. In the absence of end-organ contact (i.e., tie off distal cutaneous and muscle  
86 branches), more motoneurons traveled down the cutaneous branch compared to the  
87 motor branch. When examining potential causes for this preference, these authors  
88 identified a 2-3-fold increase in reactive Schwann cell proliferation in the cutaneous  
89 branch compared to the muscle branch following transection. This suggested that  
90 Schwann cell proliferation plays a critical role in directing motoneuron reinnervation.  
91 However, they noted, that after GCV application in transgenic GFAP-TK mice (resulting  
92 in the removal of immature Schwann cells during reinnervation) this reinnervation  
93 preference was eliminated <sup>3</sup>. Moreover, end-organ presence (i.e., patent distal

94 branches) with or without GCV resulted in motoneuron preference to the motor branch,  
95 but still some cutaneous projections. These data argue that axonal pathway selectivity  
96 is the result of a dynamic interaction between powerful attractant guidance cues  
97 emanating from the end-targets as well as reactive Schwann cells lining the distal  
98 pathway.

99 Transgenic mice, GFAP-TK in this case, have demonstrated promising results in  
100 femoral nerve regeneration. Here we present our transgenic mouse facial nerve model  
101 to study impact of Schwann cell on synkinesis following facial nerve injury and  
102 immediate primary neurorrhaphy.

## 103 **METHODS**

### 104 *Nerve transection and drug delivery procedure*

105 This study was approved in accordance to the US Army Institute of Surgical Research  
106 (ISR) IACUC protocol # A15-027. Sixteen 6-8 week old (22-27 g) female transgenic  
107 GFAP-TK mice were obtained from Jackson Laboratory (stock #005698 Bar Harbor,  
108 ME)<sup>4</sup>. Mice were anesthetized with an intraperitoneal injection of ketamine (80-100  
109 mg/kg) and midazolam (4-5 mg/kg). Depth of anesthesia was monitored by a  
110 combination of mechanical and observational monitoring techniques including but not  
111 limited to: respiratory monitoring, response to stimulus, presence or absence of  
112 movement during injury. Fur was removed from the right face and surgical field  
113 sterilized. Under microscopic visualization, a post-auricular incision was made and blunt  
114 dissection to the main trunk of right facial nerve was identified. Connective tissue was  
115 freed from surround nerve. Sharp transection of the nerve at the apex of external

116 auditory canal was made. Fibrin sealant was immediately applied to tension free  
117 apposition of nerve ends for anastomosis. The surgical bed was closed with absorbable  
118 sutures and the animals were monitored according to ISR post-procedure protocol.  
119 Osmotic pumps (Durect Inc, Cupertino, CA) filled either with saline or ganciclovir were  
120 placed in a dorsal subcutaneous pocket. Based on nominal performance data from the  
121 manufacturer we anticipate that fluid will be delivered at 0.5  $\mu\text{l/hr}$  ( $\pm$  0.1  $\mu\text{l/hr}$ ) allowing  
122 for 7 day infusion. Ganciclovir (GCV) was dosed according to Madison et al 20  
123 mg/kg/day diluted in saline. This dose is reported to kill any GFAP-TK expressing cells.  
124 At one week animals were sedated to remove osmotic pumps.

#### 125 *High-speed videography*

126 At six weeks post-operatively, the animals were imaged using high speed videography  
127 at 500 frames per second using Fastec TS3 camera (Fastec, San Diego, CA) . The  
128 camera was positioned directly overhead with lightsource positioned directly underneath  
129 A puff of air was presented to the mouse snout positioned 3 cm from a measured and  
130 standard puff delivered for 0.1 millisecond using AirStim system (San Diego  
131 Instruments, San Diego, CA). Puffs were randomly delivered, to avoid habituation.  
132 Using a modified conical tube, the body of the animal was restrained while the head  
133 was freely mobile (figure 1). Videography data was analyzed using publicly available  
134 MatLab code (Mathworks, Natick, MA) namely the BIOTACT Whisker Tracking Tool  
135 (<http://bwtt.sourceforge.net>). Please refer to this URL to review how whisker position  
136 was selected and extracted. Briefly, AVI files were uploaded to the BIOTACT program  
137 and whisker position was calculated in radians in each frame. On the right side of  
138 screen, animals left face, whisker protraction was represented with positive radian.

139 However, the left side of screen, animal's right face, whisker protraction was  
140 represented with negative radians. Figure 2 illustrates the convention of whisker  
141 movement.

142 In the GCV group, a total of 96 separate puffs were analyzed and a total of 111  
143 separate puffs were analyzed in the saline group. Videos were manually annotated to  
144 determine the exact moment eye closure began- marking the beginning at which nerve  
145 impulse started to close the eye and move the whiskers. This provided the reference  
146 point to which whisker movement was determined.

#### 147 *Statistical analysis*

148 In order to compare the movement of one whisker run to another, we compared the  
149 average velocity of the whiskers. This required solving two problems: One, the  
150 resolution of the tracking software was not sufficient to track individual whiskers, and  
151 adjacent whiskers were often confused. Two, it was not clear how long after the puff  
152 the whisker motion was relevant to the question being studied. Too long after, and the  
153 motion would be dominated by the stochastic motion which characterizes the whisker  
154 motion in an ambient environment, and looking at too few post-puff frames would not  
155 give sufficient data to extract reliable statistics.

156

#### 157 *The resolution problem*

158 The tracking software we used to determine the whisker's trajectory would often  
159 confuse two adjacent whiskers, especially when the two whiskers overlapped. This  
160 meant that the position data was not reliable for any given whisker. However, the

161 tracking software was never in error by more than two adjacent whiskers, due to how  
162 they're grouped on the mouse. This meant that while individual whiskers were  
163 unreliable, we could bin the whisker trajectories, and tracking the mean position of a  
164 given bin provided a reliable measure of the whiskers contained within that bin.

165

166 We found that binning with bins of 5 degrees enabled us to see useful features of the  
167 whisker motion (pre- and post-puff stochasticity with a quiescent period immediately  
168 post-puff) while also smoothing out the nonphysical tracking features.

169

#### 170 *Determining the relevant data*

171 To determine how many frames post-puff we were interested in, we turned to a  
172 mathematical technique called Fourier decomposition. What follows is a brief overview  
173 of the technique and how we applied it.

174

175 Given any time-series signal (in our case, the position of a whisker over time), it is  
176 possible to deconstruct that signal into a sum of pure sinusoidal waves different discrete  
177 frequencies. By including more and more of these waves, it is possible to recreate a  
178 signal to arbitrary precision. This provides a powerful tool: It is of general interest to the  
179 physical sciences to be able to say what frequencies are most powerful for a given  
180 signal.

181



182 By applying a Fourier decomposition to the whisker data, we were able to characterize  
183 the motion of the whiskers in each phase of motion. In particular, by looking at which  
184 frequencies were the most powerful at any given time, we were able to place a  
185 statistical constraint on which frames were most relevant for velocity comparison. In  
186 order to determine how many frames the initial post-puff phase lasts, we adopted the  
187 following procedure: 1) Establish the peak of the frequency distribution (the Power  
188 Spectral Density or PSD) before the puff (PSD<sub>i</sub>). 2) Calculate the peak of the PSD for  
189 increasing numbers of frames following the puff (PSD<sub>f</sub>). 3) Calculate the magnitude of  
190 the difference between these two numbers. As the number of frames increases, we  
191 expect the PSD<sub>f</sub> to diverge from PSD<sub>i</sub> until some maximum difference, at which point  
192 it will start to return to its previous stochastic motion, and the numbers begin to  
193 converge.

194

195 When we perform this analysis, we find that this peak occurs at approximately frame 20  
196 across all data runs. Fig. 4b shows an example of this analysis for one data run.

197

198 Having done this, we could extract the data from just those frames which immediately  
199 followed the puff, and look at their average velocity in order to compare the motion of  
200 whiskers from different data runs.

201

202

## 203 **RESULTS**

### 204 *High speed videography able to capture whisker response following puff stimulus*

205 At six weeks post-injury transgenic mice administered either saline or GCV were  
206 recorded with high speed videography to determine if the Biotact algorithm was  
207 sensitive enough to capture whisker movement. The raw data was expressed in radians  
208 versus frame, with each frame being 1/500 seconds. Figure 3 is sample raw data from  
209 saline treated animal.

210

### 211 *Determination of non-stochastic puff response time interval*

212 To evaluate the post-puff velocity behavior, we evaluate the whisker velocity in the 20  
213 frames immediately following the puff. That number was determined by investigating  
214 the average number of frames required for the whiskers to return to a pre-puff state.  
215 Characterizing the pre-puff motion by looking at the distribution in frequency (known as  
216 the power spectral density or PSD), we can compare the post-puff PSD (PSD<sub>f</sub>) with the  
217 pre-puff PSD (PSD<sub>i</sub>) by making a simple subtraction and taking the average value. As  
218 we increase the number of frames since the puff, this difference will grow as the  
219 frequencies of the whisker movements experience a randomization period from the puff,  
220 until they start to return to their pre-puff distribution. Thus, the difference in PSD pre-  
221 and post-puff will show a peak. This is demonstrated for one data run in figure 4a. We  
222 use this peak as the threshold to perform the velocity analysis, as this is the data which  
223 will best capture the whisker behavior immediately after the puff, before it has returned

224 to its undisturbed (pre-puff) motion. Figure 4b shows the peak for all data runs, showing  
225 that the peak occurs at  $20.4 \pm 3$  frames. For simplicity, we take the value to be 20.

226

227

228 *GCV suppression increases synkinetic facial nerve function*

229 Following puff the normal facial nerve response is to simultaneously retract the whiskers  
230 and close the eye. Calculating the velocity of whisker movement incorporates speed  
231 and direction relative to the start of eye closure. Comparison between the intact and  
232 repaired side therefore allows determination of synkinetic movement.

233 Following puff exposure, the intact side in both saline and GCV administered mice was  
234 the same with a mean velocity ( $p=0.94$ ) (Figure 5a) demonstrating GCV has no impact  
235 on intact nerves. In the saline group, velocity response between intact ( $-0.24$  rad/s,  
236 protraction) and repaired ( $0.34$  rad/s, retraction) sides was statistically different ( $p<0.05$ )  
237 (figure 5b). In the GCV group, velocity response between intact and repaired sides was  
238 statistically different, such that the right side (mean value of  $4.3$  rad/s, retraction) is  
239 significantly different from the left (mean value  $-1.2$  rad/s, protraction) ( $p<0.001$ ) (figure  
240 5C). Comparison between saline and GCV groups on the injured side demonstrated  
241 mean velocity of  $3.2$  rad/s (retraction) with GCV treatment versus saline treatment  
242 velocity  $0.8$  rad/s (retraction) ( $p<0.05$ ) (figure 5D).

243 **DISCUSSION**

244 In this study we administered GCV to mice with the transgenic mutation of GFAP-TK to  
245 suppress post-injury Schwann cell proliferation. Our main finding is that reactive  
246 Schwann cell proliferation increases synkinetic action. The basis of this study was  
247 derived from work by Madison et al where they describe following sciatic nerve injury,  
248 adult reactive Schwann cells de-differentiate and re-express glial fibrillary acidic protein  
249 (GFAP)<sup>3</sup>.

250 Defining facial nerve synkinesis is a matter of understanding normal facial nerve  
251 function. In the rodent, facial nerve function dictates eye lid and whisker position<sup>5</sup>.  
252 Following puff exposure, the intact side responded with eyelid closure and whisker  
253 protraction. In the injured side, retraction was seen with eyelid closure representing  
254 synkinesis. Suppression of reactive Schwann cells appears to worsen facial nerve  
255 recovery, suggesting that they play a key role in regeneration accuracy.

256 Here we capture facial nerve function with minimal modification to animal itself.  
257 Additionally, high spatiotemporal videography (ie 500 frames per second) allowed for  
258 large amount of data pertaining to simultaneous eyelid and whisker position. Estimation  
259 of error in calculation of whisker position was minimal at 500 frames per second<sup>6</sup>.

260 The main weakness of our study is the lack of histologic confirmation of GCV  
261 suppression of reactive Schwann cell response and success of regeneration through  
262 anastomosis and at the muscle end-plates. Additionally, various repair methods other  
263 than tissue glue could have been compared. Lastly, tracking temporal change in facial  
264 nerve function before and beyond 6 weeks could elucidate progressive worsening or  
265 improvement of facial nerve function.

266 In conclusion, this study develops the first transgenic mouse model to study synkinesis.  
267 We demonstrate, the pharmacologic suppression of Schwann negative impact on facial  
268 nerve function. The benefit of using a mouse model, is the vast number of genetic  
269 mutations that can be targeted for parallel, high through-put post-injury and therapy  
270 screening of molecular targets.

271

272

273

274

275

276

277

278

279

280

281

282

283

284

285

286

287

288

## 289 References

- 290 1. Hadlock T, Kowaleski J, Lo D, et al. Functional assessments of the rodent facial  
291 nerve: a synkinesis model. *Laryngoscope*. 2008;118(10):1744-1749.  
292 doi:10.1097/MLG.0b013e31817f5255
- 293 2. Seitz M, Grosheva M, Skouras E, et al. Poor functional recovery and muscle

- 294 polyinnervation after facial nerve injury in fibroblast growth factor-2<sup>-/-</sup> mice can be  
295 improved by manual stimulation of denervated vibrissal muscles. *Neuroscience*.  
296 2011;182:241-247. doi:10.1016/j.neuroscience.2011.03.032
- 297 3. Madison RD, Sofroniew M V, Robinson GA. Schwann cell influence on motor  
298 neuron regeneration accuracy. *Neuroscience*. 2009;163(1):213-221.  
299 doi:10.1016/j.neuroscience.2009.05.073
- 300 4. Bush TG, Puvanachandra N, Horner CH, et al. Leukocyte infiltration, neuronal  
301 degeneration, and neurite outgrowth after ablation of scar-forming, reactive  
302 astrocytes in adult transgenic mice. *Neuron*. 1999;23(2):297-308.  
303 <http://www.ncbi.nlm.nih.gov/pubmed/10399936>.
- 304 5. Kaya Y, Ozsoy U, Turhan M, Angelov DN, Sarikcioglu L. Hypoglossal-facial nerve  
305 reconstruction using a Y-tube-conduit reduces aberrant synkinetic movements of  
306 the orbicularis oculi and vibrissal muscles in rats. *Biomed Res Int*.  
307 2014;2014:543020. doi:10.1155/2014/543020
- 308 6. Perkon I, Kosir A, Itskov PM, Tasic JF, Diamond ME. Unsupervised quantification  
309 of whisking and head movement in freely moving rodents. *J Neurophysiol*.  
310 2011;jn.00764.2010. doi:10.1152/jn.00764.2010

311

312

313

314

315

316

317

318

319

320

321

322

323

324

325 Figure 1: Animal positioning with top-down high-speed videography

326

327 Figure 2: Convention of whisker movement  
328  
329 Figure 3: Raw whisker data with puff initiation marked  
330  
331 Figure 4a: Power spectral density distribution  
332  
333 Figure 4b: Power spectral density difference demonstrating post-puff peak  
334  
335 Figure 5a: Velocity response on intact side (left) after puff  
336  
337 Figure 5b: Velocity response with saline treatment  
338  
339 Figure 5c: Velocity response with GCV treatment  
340  
341 Figure 5d: Velocity comparison between saline and GCV treatment on injured side  
342  
343  
344  
345

protraction

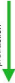

retraction

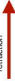

negative motion

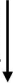

positive motion

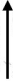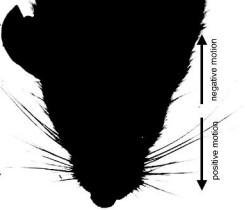

positive motion

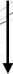

negative motion

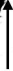



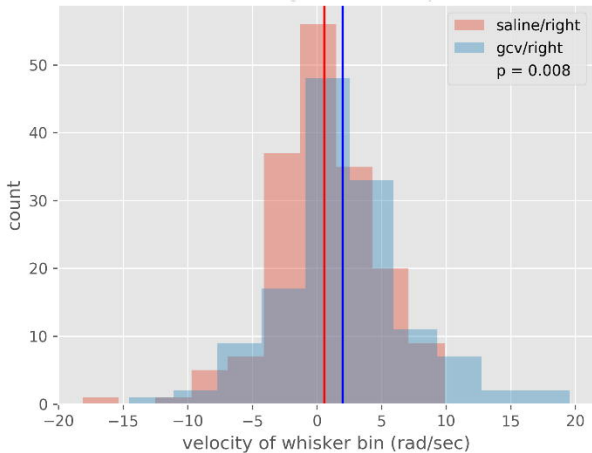

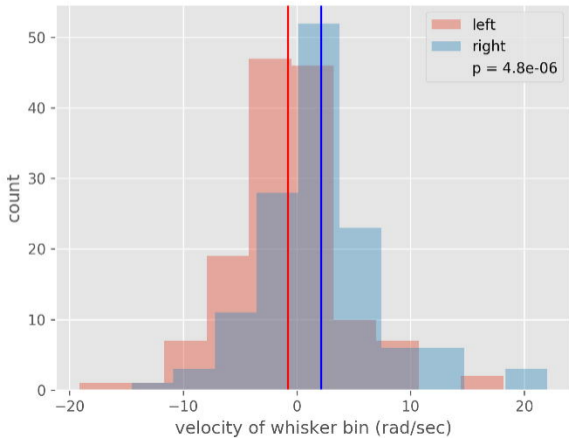

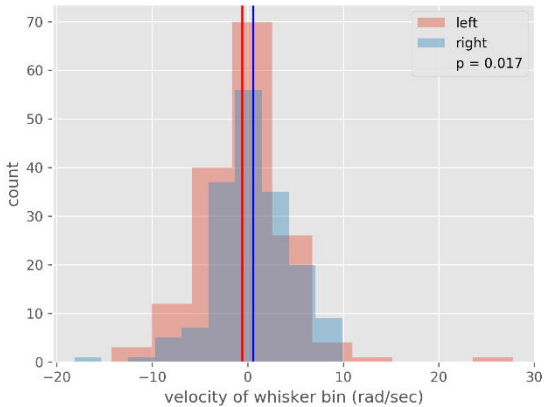

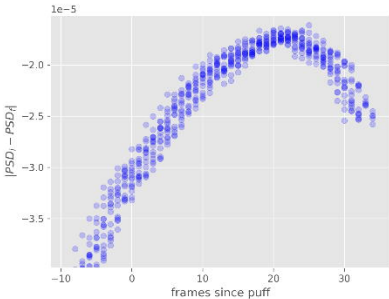

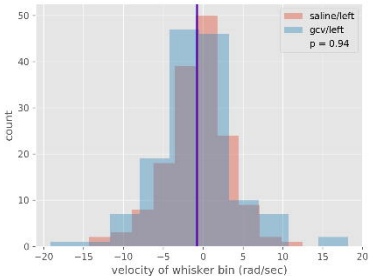







Source: https://biorxiv.org/content/biorxiv/early/2019/12/28/2019.12.27.877795.full-text.pdf
